# Supplementary material
Source: Springer Nature journal article supplement (https://www.springermedizin.de/resource/supplementary/12889_2008_1390_MOESM1_ESM.pdf/9503104)
Supplement: MOESM1 [file 9503104]

## INTERVENTION TEAM

### Michigan State University

- **Faculty & Staff** ( Departments of Nutrition Kinesiology & Human Medicine)
- **Extension Staff**
- **Undergraduate student SPartners** (Dietetic & Kinesiology seniors)
- **Medical students** (1<sup>st</sup> & 2<sup>nd</sup> year)

### Michigan Public Schools

- **Fifth grade physical education teachers**
- **Administrative staff**

## STUDY POPULATION

- 5th grade public school students from schools with  $\geq 25\%$  students qualifying for free & reduced lunch. To participate 5<sup>th</sup> grade students assented and parent/guardian consented

## PRIMARY STUDY AIMS

1. To increase the percentage of students achieving national recommendations for physical activity and nutrition behaviors
2. To improve the public school students' knowledge, attitudes and self-efficacy about heart healthy nutrition and physical activity behaviors as recommended by national guidelines
3. To improve or maintain the number of students with a desirable CVD risk factor status

## SECONDARY STUDY AIMS

1. To promote school staff and parental support for heart healthy activities to help children achieve their heart health goals
2. To provide applied hands-on learning and training for MSU health profession students

## (S)PARTNERS FOR HEART HEALTH INTERVENTION COMPONENTS

### **8 lesson plans:**

conducted by PE Teachers using JIFF with assistance from MSU SPartners

### **8 small break out-discussion meetings:**

facilitated by MSU SPartners following JIFF lesson plans

### **Ongoing web-based goal setting & tracking:**

facilitated MSU SPartners

### **School Environment:**

-Monthly bulletin boards  
- PA announcements

### **Parent Education:**

- Monthly newsletters & Q & A sessions 2 times/yr

## MEASUREMENT EVALUATION PROTOCOL\*

(Conducted the first and last month of the school year)

- **Psycho-behavioral Measurements**
  - CV health knowledge and self-efficacy for nutrition and physical activity behaviors
  - Dietary intake (food frequency) -Parental support and involvement level
  - Habitual free-living physical activity and screen time
- **Physical Measurements**
  - CVD risk factors: Body mass index (BMI), body composition, waist circumference, resting blood pressure, blood cholesterol, C-reactive protein, and aerobic fitness
- **Process Evaluation & Focus Groups**
  - evaluation of protocol compliance
  - focus groups with teachers, school administrators, 5<sup>th</sup> grade students and their parents

\* A data summary of CVD risk status will be given to parents and includes comparisons with norms and tips on how nutrition and exercise can positively influence risk factor status
